# Supplementary material for: Ultrasensitive colorimetric detection of circulating tumor DNA using hybridization chain reaction and the pivot of triplex DNA
Source: PubMed Central journal article supplement (PMC5343571; doi:10.1038/srep44212), 2017-03-09
Supplement: srep44212-s1.pdf [file srep44212-s1.pdf]

## Supplementary Information

### Ultrasensitive colorimetric detection of circulating tumor DNA using hybridization chain reaction and the pivot of triplex DNA

Ruimin Li, ‡ Li Zou, ‡ Yanwei Luo, Manjun Zhang, and Liansheng Ling\*

School of Chemistry, Sun Yat-Sen University, Guangzhou 510275, P. R. China

‡Ruimin Li and Li Zou contributed equally to this work.

\* Correspondence and requests for materials should be addressed to L.L. (email: cesllsh@mail.sysu.edu.cn)

**Effect of the experimental conditions.** The temperature of the reaction solution and pH value of Tris-Ac buffer are important to the catalytic activity of the asymmetrically split G-quadruplex/hemin DNAzymes. For the purpose of getting high sensitivity, temperature of the reaction solution and pH value of Tris-Ac buffer in the proposed colorimetric sensing system were investigated over the range of 15-50 °C and pH 5.0-8.0, respectively. As demonstrated in Figure 4a, the asymmetrically split G-quadruplex/hemin DNAzymes had high catalytic activity toward the reaction of ABTS<sup>2-</sup> and H<sub>2</sub>O<sub>2</sub> in the range of 15-30 °C. However, the relative activity of the catalytic system declined rapidly at temperature above 37 °C. It was inferred that the high temperature had adverse impact on the forming of triplex DNA and the catalytic activity of the asymmetrically split G-quadruplex/hemin DNAzymes.<sup>1,2</sup> Thus, 25 °C was chosen as the optimal reaction temperature for the colorimetric assay. In the type of parallel triplex DNA, the composed C-G·C triads had well stability under acidic pH environment and could not be formed under physiological conditions. Recently, it was studied that Ag<sup>+</sup> had the ability to stabilize the forming of C-G·C triads under neutral pH environment.<sup>3</sup> The pH-dependent response curve of Tris-Ac buffer was shown in Figure 4b. The relative activity of the reaction mixture (2.0 mM H<sub>2</sub>O<sub>2</sub>, 0.2 mM ABTS<sup>2-</sup>, 0.25 mM Spermine, 0.15 μM Ag<sup>+</sup>, 25 °C) increased with the pH value increment of Tris-Ac buffer over the range of pH 5.0-7.0, and kept high activity over the range of pH 7.0-8.0. The phenomenon suggested that the triplex DNA was stable under neutral pH environment

with the aid of  $\text{Ag}^+$  and the asymmetrically split G-quadruplex/hemin DNAzymes had high catalytic activity under neutral pH environment.<sup>4</sup> Therefore, pH 7.4 of Tris-Ac buffer was selected as the optimal pH reaction environment.

$\text{H}_2\text{O}_2$  and  $\text{ABTS}^{2-}$  are essential to the color catalytic reaction system. Thus, to optimize the concentrations of  $\text{H}_2\text{O}_2$  and  $\text{ABTS}^{2-}$  is of importance for the sensitivity of the colorimetric assay. As shown in Figure 4c, the concentrations of  $\text{H}_2\text{O}_2$  were investigated over the range of 0.50-3.0 mM. With the increase of  $\text{H}_2\text{O}_2$ , the relative activity of the reaction system increased in the range of 0.50-2.0 mM, and then weakened with the addition of  $\text{H}_2\text{O}_2$ . High concentration of  $\text{H}_2\text{O}_2$  had negative impact on the catalytic activity of the asymmetrically split G-quadruplex/hemin DNAzymes. Herein, the optimized concentration of  $\text{H}_2\text{O}_2$  was 2.0 mM in the color catalytic reaction system. The  $\text{ABTS}^{2-}$ -dependent response curve was depicted in Figure 4d. In the range of  $\text{ABTS}^{2-}$  0.05-0.15 mM, the relative activity of the colorimetric system increased with the augment of  $\text{ABTS}^{2-}$  concentration, and kept unchangeable with the continued addition of  $\text{ABTS}^{2-}$ . Hence, the  $\text{ABTS}^{2-}$  concentration 0.20 mM was used as optimal condition in the colorimetric system.

Spermine, a polycationic, low-molecular-weight molecule, not only has the ability to promote and stabilize triplex DNA structures, but also plays an important role in the activity enhancement of G-quadruplex/hemin DNAzyme.<sup>5,6</sup> Thus, the optimization of spermine concentration is necessary to ensure the high sensitivity of the color system. As shown in Figure 4e, the concentrations of spermine were investigated over the range of 0-0.50 mM. With the augment of spermine, the relative activity of the reaction system increased in the range of 0-0.25 mM, and then decreased with the addition of spermine. High concentration of spermine may cause the change of the structures of triplex DNA and the asymmetrically split G-quadruplex, and slackened the catalytic activity of the asymmetrically split G-quadruplex/hemin DNAzymes.<sup>7</sup> Herein, the optimized concentration of spermine was 0.25 mM in the color catalytic system. Since the G-quadruplex/hemin DNAzymes had high catalytic activity under neutral pH environment, construction of the stable triplex DNA under neutral pH was inevitable to the high sensitivity of the colorimetric assay.  $\text{Ag}^+$  was known to stabilize the structure

of a parallel DNA triplex under neutral pH condition.<sup>3</sup> For the high sensitivity of the assay, the  $\text{Ag}^+$  concentrations were studied over the range of 0-0.40  $\mu\text{M}$ . As described in Figure 4f, by the introduction of  $\text{Ag}^+$ , the relative activity of the reaction system increased with the increase of  $\text{Ag}^+$  concentration in the range 0-0.15  $\mu\text{M}$ , but declined when  $\text{Ag}^+$  concentration was higher than 0.20  $\mu\text{M}$ . It was suggested that excess  $\text{Ag}^+$  could chelate guanine bases at the binding sites involved in G-quadruplex formation, may disrupt these structures and inhibit the peroxidase activity of the asymmetrically split G-quadruplex/hemin.<sup>8</sup> Hence, the optimized concentration of  $\text{Ag}^+$  was 0.15  $\mu\text{M}$  in the color catalytic system.

## References

- (1) Li, R., Xiong, C., Xiao, Z. & Ling, L. Colorimetric detection of cholesterol with G-quadruplex-based DNAzymes and ABTS<sup>2-</sup>. *Anal. Chim. Acta* **724**, 80-85 (2012).
- (2) Yan, H., Xiong, C., Yuan, H., Zeng, Z. & Ling, L. Spacer Control the Dynamic of Triplex Formation between Oligonucleotide-Modified Gold Nanoparticles. *J. Phys. Chem. C* **113**, 17326-17331 (2009).
- (3) Ihara, T., Ishii, T., Araki, N., Wilson, A. & Jyo, A. Silver Ion Unusually Stabilizes the Structure of a Parallel-Motif DNA Triplex. *J. Am. Chem. Soc.* **131**, 3826-3827 (2009).
- (4) Xiao, Z., Guo, X. & Ling, L. Sequence-specific recognition of double-stranded DNA with molecular beacon with the aid of  $\text{Ag}^+$  under neutral pH environment. *Chem. Commun.* **49**, 3573-3575 (2013).
- (5) Beck, A., Vijayanathan, V., Thomas, T. & Thomas, T. J. Ionic microenvironmental effects on triplex DNA stabilization: Cationic counterion effects on poly(dT)·poly(dA)·poly(dT). *Biochimie* **95**, 1310-1318 (2013).
- (6) Qi, C. et al. Activity enhancement of G-quadruplex/hemin DNAzyme by spermine. *RSC Adv.* **4**, 1441-1448 (2014).
- (7) Musso, M. et al. Effects of Chain Length Modification and Bis(ethyl) Substitution of Spermine Analogs on Purine-Purine-Pyrimidine Triplex DNA Stabilization, Aggregation, and Conformational Transitions. *Biochemistry* **36**, 1441-1449 (1997).
- (8) Zhou, X., Kong, D. & Shen, H.  $\text{Ag}^+$  and Cysteine Quantitation Based on G-Quadruplex-Hemin DNAzymes Disruption by  $\text{Ag}^+$ . *Anal. Chem.* **82**, 789-793 (2010).

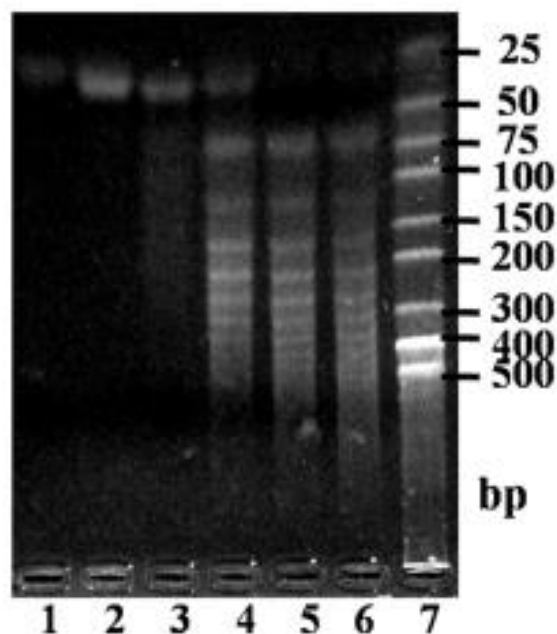

**Figure S1.** The agarose gel electrophoresis assay of HCR products.

**Table S1.** Comparison of colorimetric methods for DNA detection

| Strategy                                                        | Linear range | Detection limit | Ref       |
|-----------------------------------------------------------------|--------------|-----------------|-----------|
| HCR amplification & the asymmetrically split G-quadruplex/hemin | 0.5-500 pM   | 0.1 pM          | This work |
| HCR amplification & G-quadruplex/hemin                          | -----        | 7.5 nM          | 28        |
| HCR amplification & label-free AuNPs                            | 0-0.5 nM     | 50 pM           | 29        |
| catalytic hairpin assembly amplification & label-free AuNPs     | 50-300 pM    | 15 pM           | 30        |
| HCR amplification & labeled AuNPs                               | 10-500 pM    | 5 pM            | 17        |

**Table S2.** Comparison of the strategies for ctDNA detection

| <b>Detection method</b> | <b>Strategy</b>                                                 | <b>Linear range</b> | <b>Detection limit</b>  | <b>Ref</b> |
|-------------------------|-----------------------------------------------------------------|---------------------|-------------------------|------------|
| Colorimetric            | HCR amplification & the asymmetrically split G-quadruplex/hemin | 0.5-500 pM          | 0.1 pM                  | This work  |
| SERS                    | SWNTs & CuNP                                                    | 10 fM -1 nM         | 1.5 fM                  | 34         |
| Refractometric          | Peptide nucleic acids & immunogold colloids                     | -----               | 0.05 pM                 | 35         |
| Electrochemical         | Clamp                                                           | -----               | 1 fg $\mu\text{l}^{-1}$ | 36         |
